# Supplementary material for: Perovskites beyond photovoltaics: field emission from morphology-tailored nanostructured methylammonium lead triiodide
Source: Royal Society of Chemistry journal article supplement (doi:10.1039/c7cp04038e), 2017-01-01
Supplement: c7cp04038e1.pdf [file c7cp04038e1.pdf]

## Perovskite Beyond Photovoltaics: Field Emission from Morphology Tailored Nanostructured Methylammonium Lead Triiodide

Nripen Besra<sup>a</sup>, Shreyasi Pal<sup>a,c</sup>, Bikram Kumar Das<sup>a</sup> and Kalyan Kumar Chattopadhyay<sup>a,b\*</sup>

<sup>a</sup>*Thin Films and Nanoscience Laboratory, Department of Physics, Jadavpur University,  
Kolkata- 700032, India.*

<sup>b</sup>*School of Materials Science and Nanotechnology, Jadavpur University, Kolkata- 700032,  
India.*

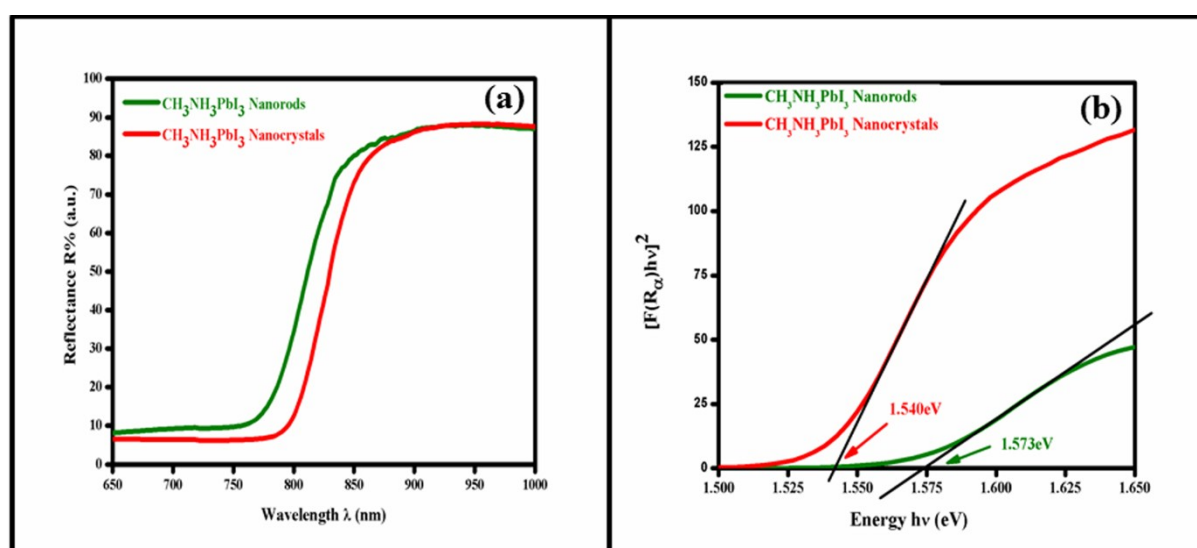

**Figure S1:** (a) Reflectance  $R$  (%) vs.  $\lambda$  (nm) spectra, (b) Kubelka – Munk plot for direct energy band gap type of  $\text{CH}_3\text{NH}_3\text{PbI}_3$  nanorods and nanocrystals.

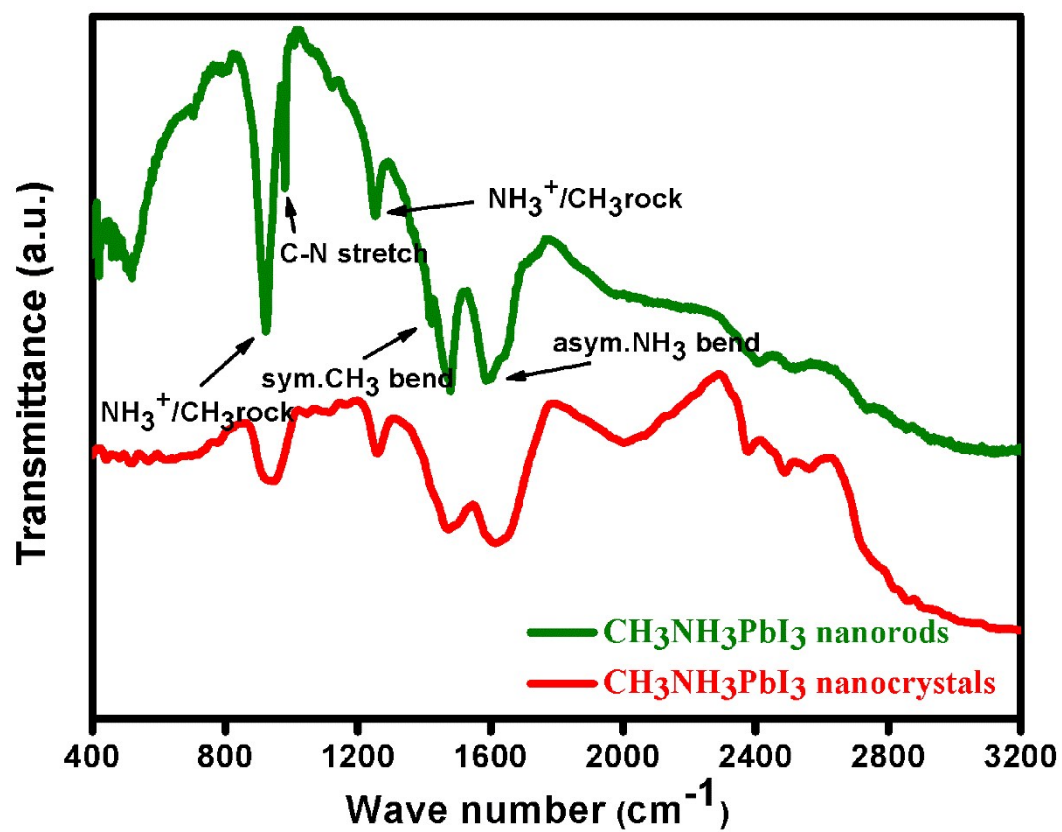

**Figure S2:** FTIR transmittance spectra of  $\text{CH}_3\text{NH}_3\text{PbI}_3$  nanorods and nanocrystals.

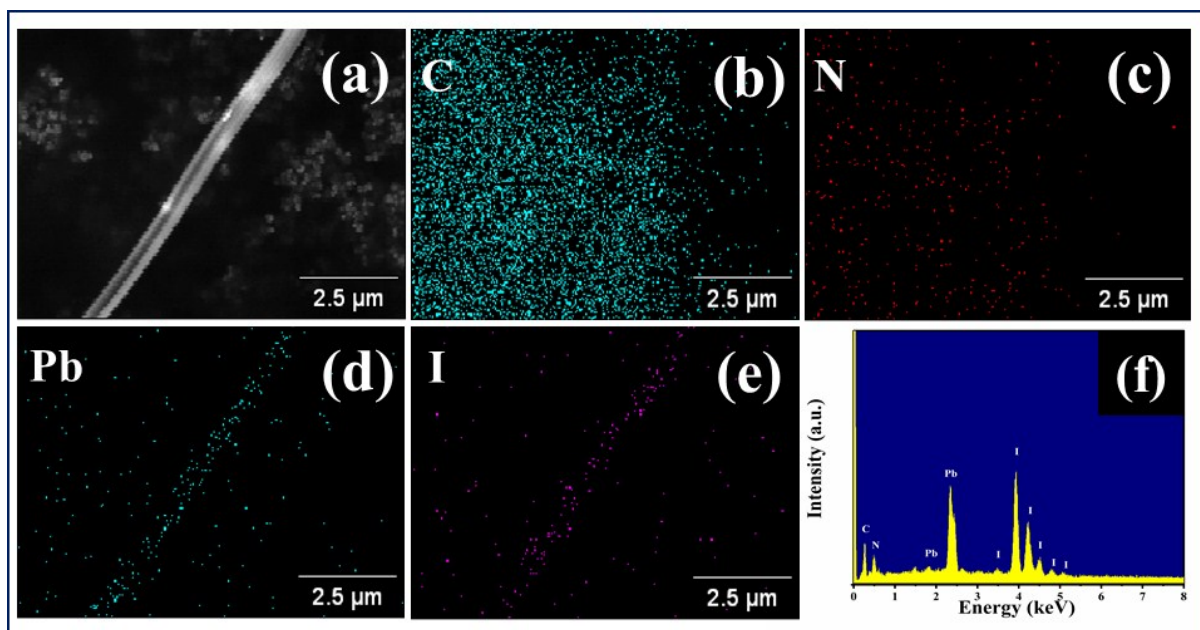

**Figure S3:** Elemental mappings and Energy dispersive X-ray spectra of  $\text{CH}_3\text{NH}_3\text{PbI}_3$  nanorods.

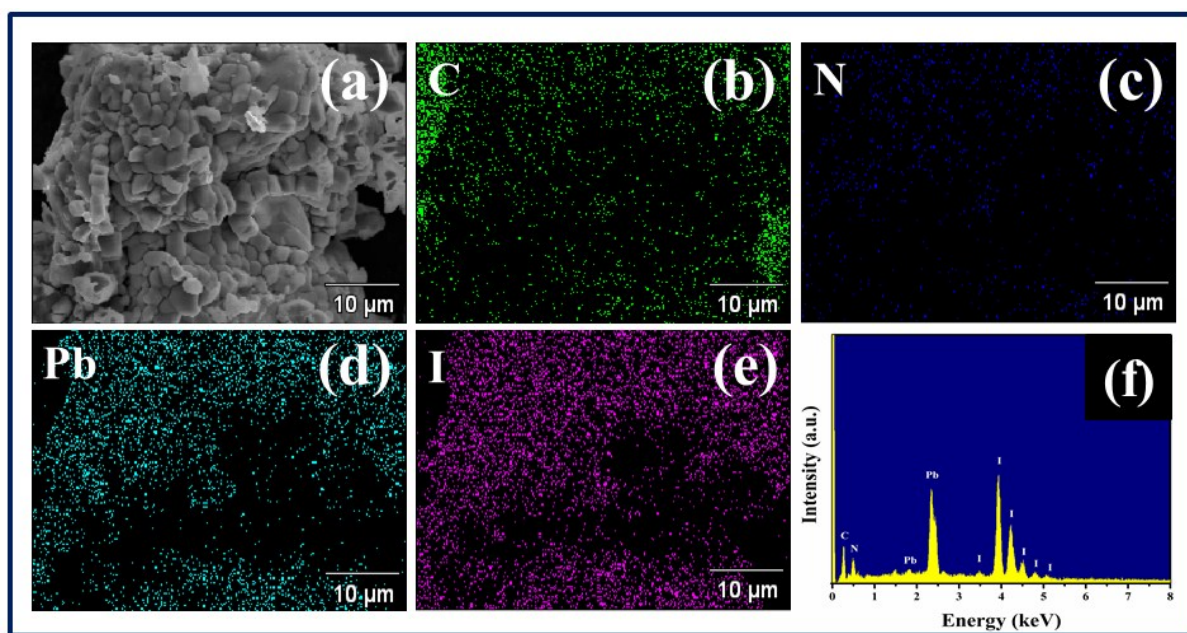

**Figure S4:** Elemental mappings and Energy dispersive X-ray spectra of  $\text{CH}_3\text{NH}_3\text{PbI}_3$  nanocrystals.

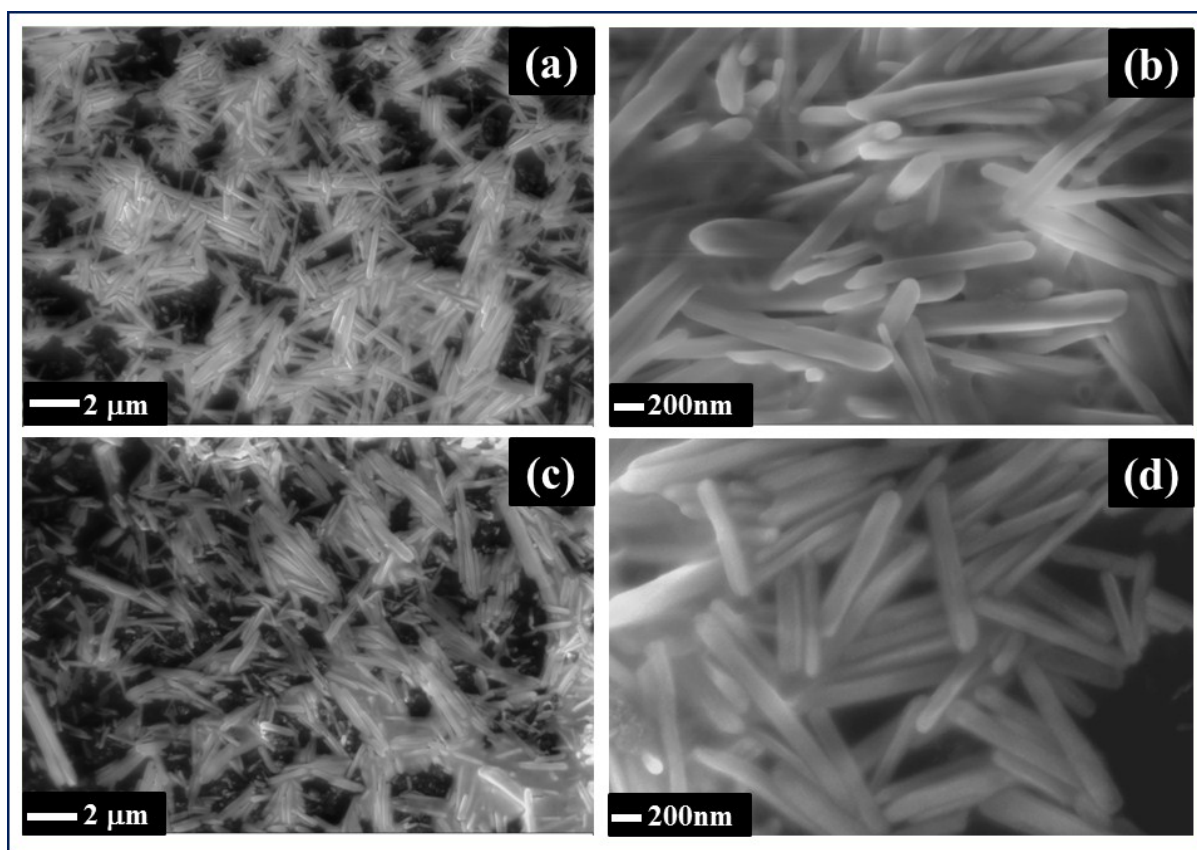

**Figure S5:** Low and high magnification FESEM images of  $\text{CH}_3\text{NH}_3\text{PbI}_3$  nanorods before (figure (a) and (b) respectively) and after (figure (c) and (d) respectively) FE measurement respectively.

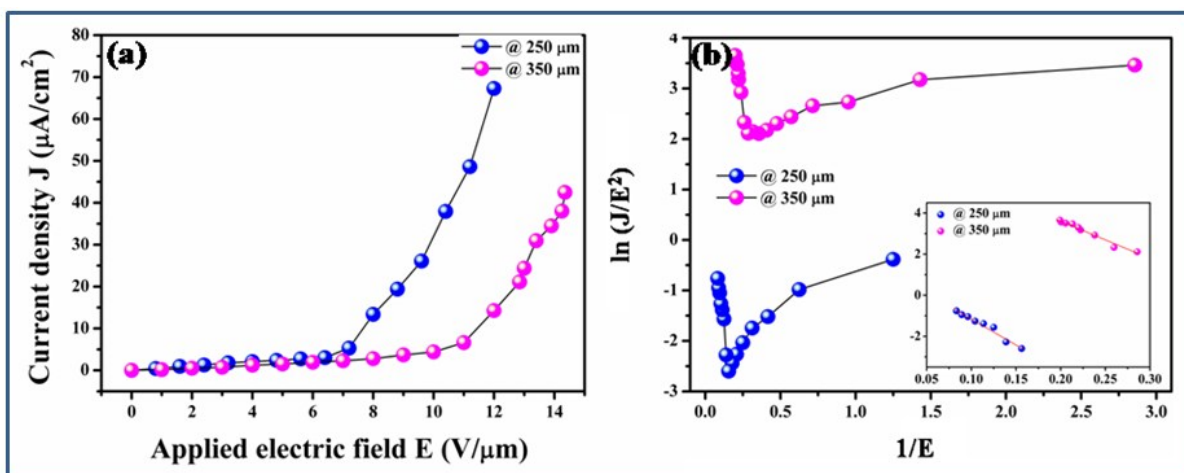

**Figure S6:** JE (figure a) and FN characteristics (figure b; inset showing the linear characteristic feature) respectively of  $\text{CH}_3\text{NH}_3\text{PbI}_3$  nanorods at inter electrode separations 250  $\mu\text{m}$  and 350  $\mu\text{m}$ .

N. Besra et al.
